# Supplementary material
Source: publisher site journal article supplement (https://www.dovepress.com/article/452085)
Supplement: Supplementary file 1 [file get_supplementary_file.php]

**Supplementary information**

**PDADMAC/ALGINATE-COATED GOLD NANOROD FOR ERADICATION OF *STAPHYLOCOCCUS AUREUS* BIOFILMS**

**Malarmugila Manimaran1,a, , Yin Yin Teo2, James Chen Yong Kah3, Adilet Beishenaliev1, Yean Leng Loke2, Yiing Yee Foo1, Shiow-Fern Ng4, Chin Fei Chee5, Sek Peng Chin6, Farid Nazeer Faruqu1, Chia-Yu Chang7, Misni Misran2, Lip Yong Chung6, Bey Fen Leo8,a, Shih-Hwa Chiou9,10, Chia-Ching Chang7,11,12,13,*, Sun Tee Tay14, Lik Voon Kiew1,7***

*1Department of Pharmacology, Faculty of Medicine, Universiti Malaya, Kuala Lumpur, Malaysia*

*2Department of Chemistry, Faculty of Science, Universiti Malaya, Kuala Lumpur, Malaysia*

*3Department of Biomedical Engineering, College of Design and Engineering, National University of Singapore, Singapore, Singapore*

*4Centre for Drug Delivery Technology and Vaccine, Faculty of Pharmacy, Universiti Kebangsaan Malaysia, Kuala Lumpur, Malaysia*

*5Nanotechnology Catalysis Research Centre, Universiti Malaya, Kuala Lumpur, Malaysia*

*6Department of Pharmaceutical Chemistry, Faculty of Pharmacy, Universiti Malaya, Kuala Lumpur, Malaysia*

*7Department of Biological Science and Technology, National Yang Ming Chiao Tung University, Hsinchu, Taiwan, Republic of China*

*8Department of Molecular Medicine, Faculty of Medicine, Universiti Malaya, Kuala Lumpur, Malaysia*

*9Department of Medical Research, Taipei Veterans General Hospital, Taipei, Taiwan, Republic of China*

*10Institute of Pharmacology, National Yang Ming Chiao Tung University, Taipei, Taiwan, Republic of China*

*11Department of Electrophysics, National Yang Ming Chiao Tung University, Hsinchu, Taiwan, Republic of China*

*12Center for Intelligent Drug Systems and Smart Bio-devices, National Yang Ming Chiao Tung University, Hsinchu, Taiwan, Republic of China*

*13Institute of Physics, Academia Sinica, Nankang, Taipei, Taiwan, Republic of China.*

*14Department of Medical Microbiology, Faculty of Medicine, Universiti Malaya, Kuala Lumpur, Malaysia*

a These authors contributed equally to this work.

*** Corresponding authors:**

Chia-Ching Chang, [ccchang01@nycu.edu.tw](mailto:ccchang01@nycu.edu.tw)

Lik-Voon Kiew, [lvkiew@um.edu.my](mailto:lvkiew@um.edu.my)

**A. Concentration of Gold Nanorods (GNR)**


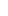
The concentration of the GNR was estimated from the UV-visible spectra of the GNR using a technique derived from a previous study. The extinction coefficient value of GNR was obtained through the equation:

,

where x is the wavelength in the UV-visible spectra, and y is the extinction coefficient. Thus, the concentration1 of GNR was calculated based on the equation: nM, where absorbance value2 was obtained from the UV-visible spectrophotometer, and y is the extinction coefficient.3

**B. Effects of PDADMAC on bacterial biofilms**

Graph of PDADMAC solution alone without the combination of GNR doesn’t show significant biofilm eradication but poses below 35% of eradication even at a high concentration of 5 mg/mL.


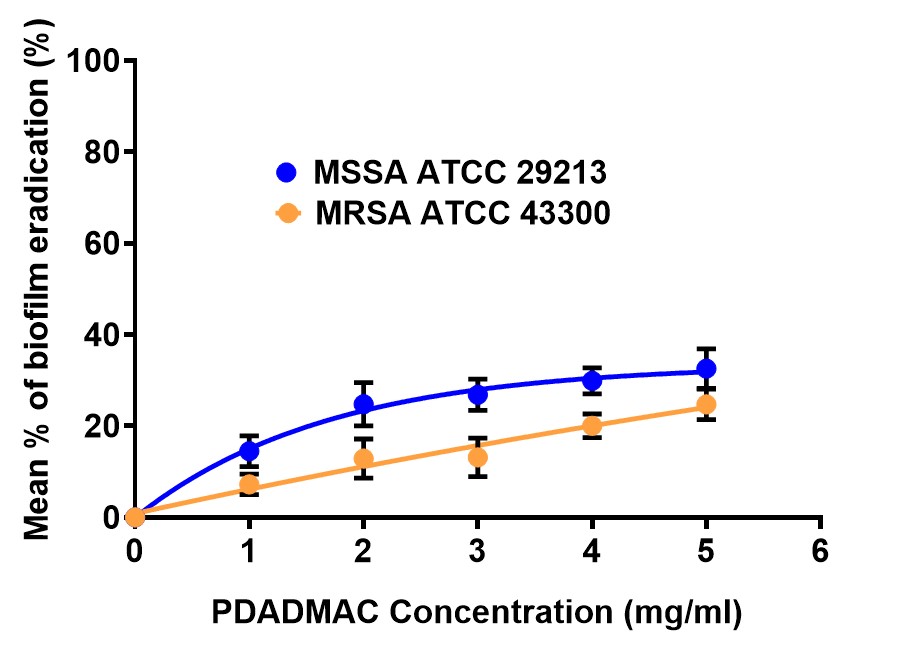


**Figure S1.** Poly(diallyldimethylammonium chloride) (PDADMAC) at working concentrations (5 mg/mL) did not cause a significant biofilm eradication after 24 hours of incubation, suggesting the PDADMAC/alginate-coated gold nanorods (GNR/Alg/PDADMAC)’s ability in biofilm eradication was not due to PDADMAC solely. Data are represented as mean ± SD (n = 3).

**C. Calculation of the percentage of biofilm eradication**

The percentage of biofilm eradication was calculated using the formula:

1. Absorbance value - Average sterility control absorbance value = **Normalised absorbance value.**

2. 100 (1-normalised absorbance value/Average growth control absorbance value) = **% Biofilm Eradication.**

3. Plot **concentration** (x- axis) against **average value of biofilm eradication** (y-axis) + standard deviation.

****MBEC 50 =*** *Minimum biofilm eradication concentration that eradicates 50% of biofilm*


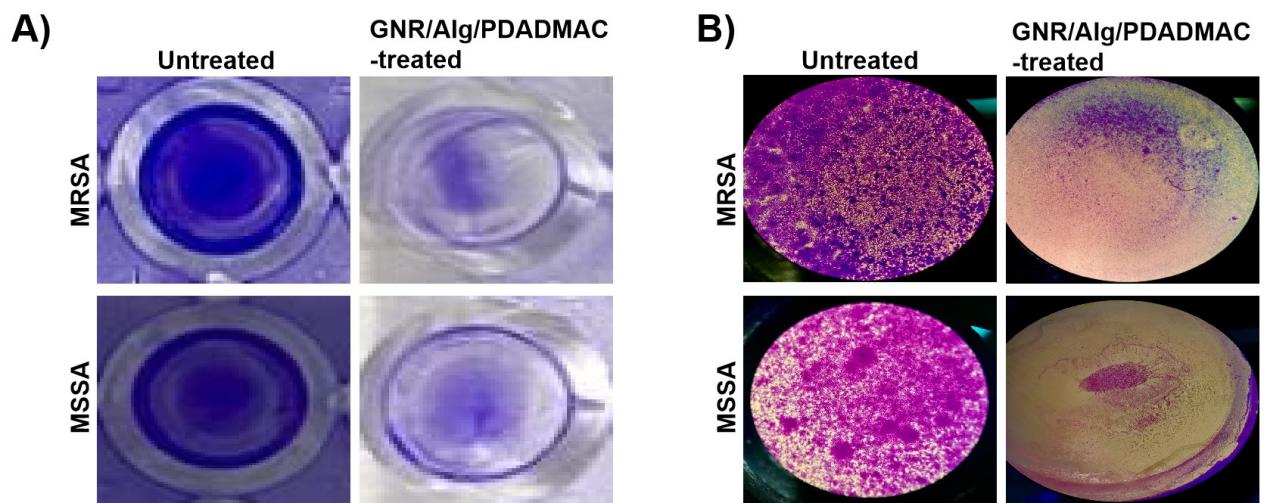


**Figure S2.** (**A)** microtiter well pictures after CV staining of untreated and GNR/Alg/PDADMAC-treated biofilms of MRSA and MSSA, showing less CV stain in both MRSA and MSSA biofilms after exactly 16.5 minutes and 17 minutes of GNR/Alg/PDADMAC treatment. (**B)** Microscopic picture further enhanced the ability of GNR/Alg/PDADMAC at 0.15 nM to eradicate 50% (MBEC50) of MRSA and MSSA biofilm within 16.5 and 17 minutes, respectively. Pictures A and B manifest that the composition of both GNR/Alg/PDADMAC-treated MRSA and MSSA biofilms were reduced significantly at a shorter time, 16.5 minutes and 17 minutes.

**D. Effects of GNR/Alg/PDADMAC on the biofilms of Gram-negative bacteria**

The effects of GNR/Alg/PDADMAC on the biofilms of Gram-negative bacteria, i.e. *Pseudomonas aeruginosa*, *Escherichia coli*, and *Klebsiella pneumonia* was performed. Results revealed that GNR/Alg/PDADMAC was ineffective in eradicating the biofilms of the Gram-negative bacteria at the concentration range tested (0.002 – 0.3 nM) although similar concentration range was effective in eradicating Gram-positive MRSA and MSSA biofilms (Figure S3). This suggests the avenues of further improvement onto the GNR/Alg/PDADMAC to expand its biofilm eradication spectrum. Meanwhile the positive control triclosan at high concentration (345 µM) showed effective eradication of Gram-Positive MRSA and MSSA biofilms as well as the biofilms of Gram-negative *Klebsiella pneumonia* and *Escherichia coli*, but not the biofilms of *Pseudomonas aeruginosa* (Figure S4)


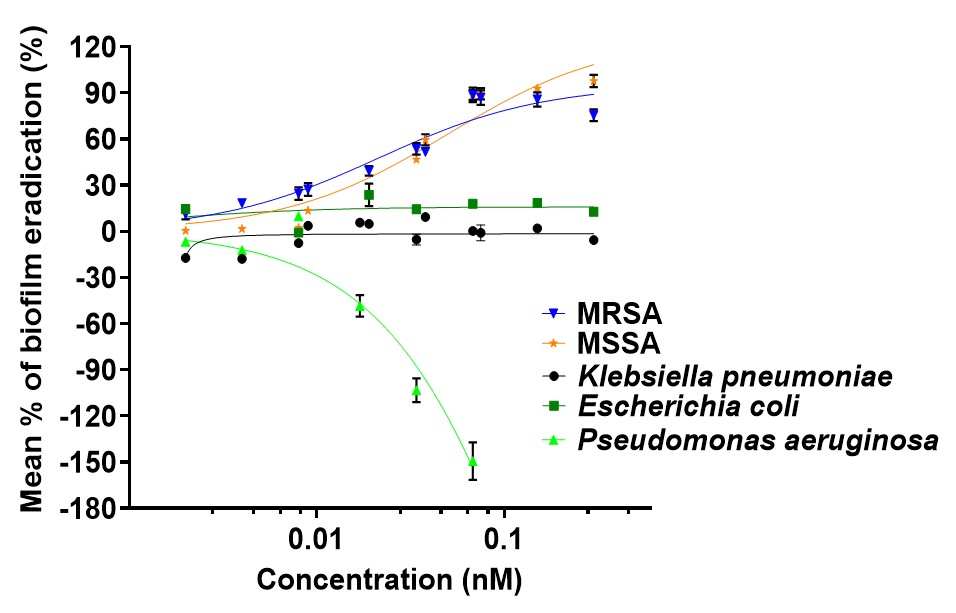


**Figure S3.** PDADMAC/alginate-coated gold nanorod (GNR/Alg/PDADMAC) showing inefficient *Klebsiella pneumonia*, *Pseudomonas aeruginosa* and *Escherichia coli* biofilm eradication but effectively remove Gram-positive bacteria (MRSA and MSSA) at increasing concentration. Data are represented as mean ± SD (n = 3).


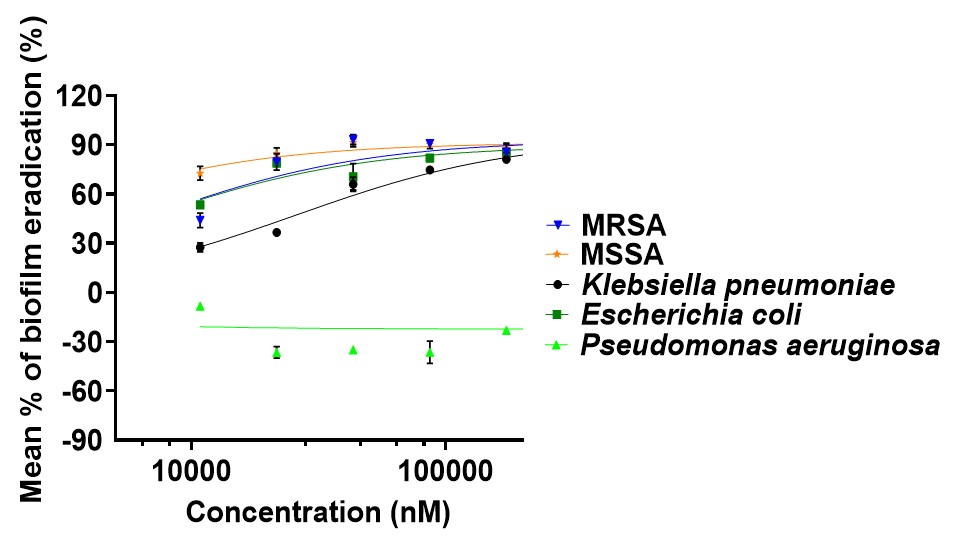


**Figure S4.** Triclosan at high concentration (345 µM) showed effective eradication of the biofilms of the Gram-Positive MRSA and MSSA as well as Gram-negative *Klebsiella pneumonia* and *Escherichia coli*, but not the biofilms of Gram-negative *Pseudomonas aeruginosa* (Figure S4).

**E. Effects of GNR/Alg on the biofilms of MRSA and MSSA**

The effects of GNR/Alg on the biofilms of MRSA and MSSA was performed. Results revealed that GNR/Alg was ineffective in eradicating the biofilms of the MRSA and MSSA at the concentration range tested (0.002 – 0.3 nM) (Figure S5).


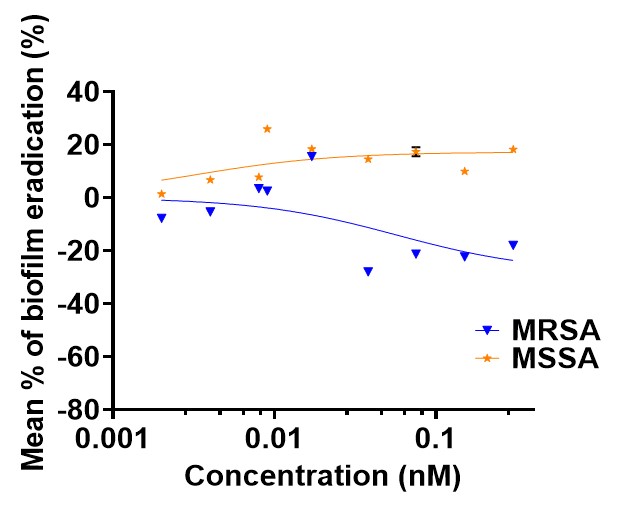


**Figure S5.** GNR/Alg was ineffective in eradicating the biofilms of the MRSA and MSSA at the concentration range tested (0.002 – 0.3 nM). Data are represented as mean ± SD (n = 3).

**F. CLSM studies:**

Figure S6 displays CLSM pictures comparing the reduction in biofilm and cell death between the GNR/Alg/PDADMAC-treated strains of MRSA and MSSA with the control strain.


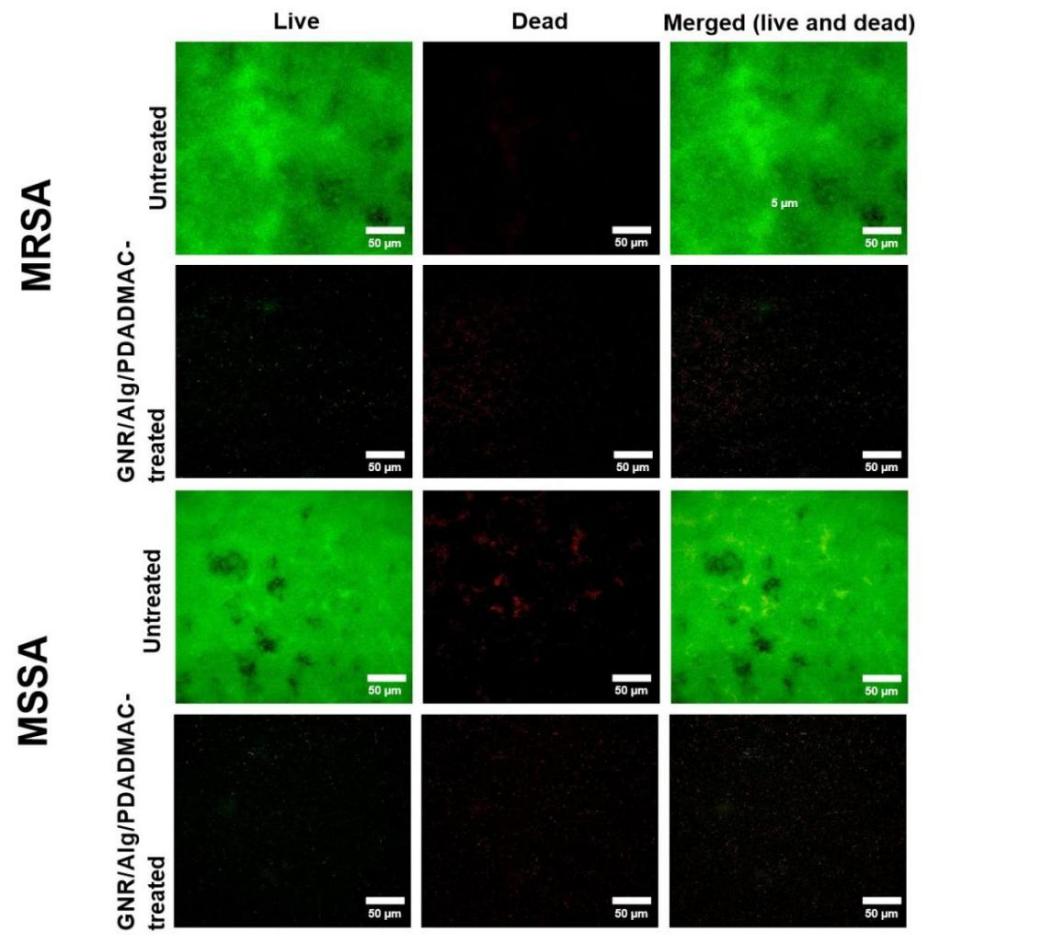


**Figure S6.** Two-dimensional (2D) CLSM images of MRSA and MSSA strains under 40× magnification, manifesting the viability of both PDADMAC/alginate-coated gold nanorod (GNR/Alg/PDADMAC)-treated MRSA and MSSA biofilms were reduced significantly (Scale bar = 50 µM).

**REFERENCES**

1. Selvaraj, A.; Jayasree, T.; Valliammai, A.; Pandian, SK., Myrtenol attenuates MRSA biofilm and virulence by suppressing sarA expression dynamism. *Frontiers in Microbiology* **2019,** *10*, 2027.

2. Nikoobakht, B.; El-Sayed, MA., Preparation and growth mechanism of gold nanorods (NRs) using seed-mediated growth method. *Chemistry of Materials* **2003,** *15* (10), 1957-1962.

3. Orendorff, CJ.; Murphy, CJ., Quantitation of metal content in the silver-assisted growth of gold nanorods. *The Journal of Physical Chemistry B,* **2006,** 110 *(9)*,3990-3994.
